# Supplementary material for: In vitrofermentation outcomes of arabinoxylan and galactoxyloglucan depend on fecal inoculum more than substrate chemistry
Source: Royal Society of Chemistry journal article supplement (doi:10.1039/d0fo01103g), 2020-01-01
Supplement: d0fo01103g1.pdf [file d0fo01103g1.pdf]

## Supplementary Tables

**Table S1** Number of reads identified by GraftM per substrate × time × inoculum

|           |           | Time     | Bacteria | Archaea | Unclassified |   |
|-----------|-----------|----------|----------|---------|--------------|---|
| Porcine 1 | Inoculum  | 0 h      | 10620    | 27      | 4            |   |
|           |           | 4 h      | 18513    | 170     | 2            |   |
|           | WAX       | 8 h      | 19753    | 387     | 1            |   |
|           |           | 48 h     | 13481    | 274     | 4            |   |
|           |           | 4 h      | 24281    | 156     | 1            |   |
|           | RAX       | 8 h      | 18327    | 241     | 3            |   |
|           |           | 48 h     | 15084    | 247     | 1            |   |
|           |           | Inoculum | 0 h      | 8896    | 27           | 0 |
|           | Porcine 2 | WAX      | 12 h     | 26361   | 56           | 0 |
| 18 h      |           |          | 35810    | 44      | 0            |   |
| 72 h      |           |          | 27935    | 39      | 0            |   |
| GXG       |           | 12 h     | 30817    | 97      | 0            |   |
|           |           | 18 h     | 41442    | 74      | 0            |   |
|           |           | 72 h     | 23458    | 37      | 1            |   |
| Human     |           | Inoculum | 0 h      | 29874   | 22           | 0 |
|           |           |          | 4 h      | 36708   | 9            | 0 |
|           |           | WAX      | 8 h      | 33692   | 7            | 0 |
|           | 48 h      |          | 33749    | 28      | 1            |   |
|           | GXG       | 7 h      | 29845    | 3       | 0            |   |
|           |           | 11 h     | 23606    | 4       | 0            |   |
|           |           | 48 h     | 28414    | 29      | 1            |   |

The numbers of Porcine 1 were the sum of two fermentation replicates, and those of Porcine 2 were the sum of three fermentation replicates. The numbers of 16s rRNA sequence in Human samples were identified from the metagenomics shotgun sequencing of pooled DNA from the three fermentation replicates.

**Table S2** Relative abundance of major phyla detected in the porcine and human fecal inoculum.

| <b>Phylum</b>   | <b>H_Inoc</b> | <b>P1_Inoc</b> | <b>P2_Inoc</b> |
|-----------------|---------------|----------------|----------------|
| Firmicutes      | 74.197%       | 35.884%        | 40.939%        |
| Melainabacteria | 0.003%        | 25.650%        | 16.205%        |
| Bacteroidetes   | 15.450%       | 5.126%         | 10.546%        |
| Actinobacteria  | 8.627%        | 7.915%         | 8.730%         |
| Proteobacteria  | 1.254%        | 4.647%         | 8.237%         |
| Tenericutes     | 0.107%        | 5.164%         | 6.085%         |
| Euryarchaeota   | 0.074%        | 0.244%         | 0.224%         |
| Chloroflexi     | 0.003%        | 0.141%         | 0.370%         |
| Verrucomicrobia | 0.224%        | 0.113%         | 0.000%         |
| TM7             | 0.003%        | 0.028%         | 0.303%         |
| Parvarchaeota   | 0.000%        | 0.009%         | 0.078%         |
| WPS-2           | 0.000%        | 0.009%         | 0.034%         |
| Acidobacteria   | 0.003%        | 0.009%         | 0.011%         |
| Spirochaetes    | 0.000%        | 0.000%         | 0.022%         |
| Elusimicrobia   | 0.000%        | 0.009%         | 0.011%         |
| Others          | 0.054%        | 15.013%        | 8.204%         |

Those phyla with < 0.01% relative abundance across all the inocula were assigned to “Others”.

**Table S3** Results of the core microbiome analysis of the major OTUs as grouped by each fermentation experiment (P1: Porcine 1; P2: Porcine 2; H: Human)

| Taxa                                | Type   | Details | H.abu | P1.abu | P2.abu | H.occ | P1.occ | P2.occ |
|-------------------------------------|--------|---------|-------|--------|--------|-------|--------|--------|
| <i>g__Blautia</i>                   | unique | H       | 7.629 | 0      | 0.003  | 1     | 0      | 0.29   |
| <i>g__Bacteroides</i>               | unique | H       | 7.124 | 0      | 0      | 1     | 0      | 0      |
| <i>f__Ruminococcaceae</i>           | unique | H       | 5.927 | 0.003  | 0      | 1     | 0.29   | 0      |
| <i>Faecalibacterium prausnitzii</i> | unique | H       | 5.109 | 0      | 0      | 1     | 0      | 0      |
| <i>Bacteroides plebeius</i>         | unique | H       | 3.571 | 0      | 0      | 1     | 0      | 0      |
| <i>Parabacteroides distasonis</i>   | unique | H       | 1.604 | 0      | 0      | 1     | 0      | 0      |
| <i>Bifidobacterium adolescentis</i> | pan    | H&P1    | 1.229 | 0.014  | 0.004  | 1     | 0.86   | 0.29   |
| <i>Prevotella copri</i>             | core   | H&P1&P2 | 0.094 | 20.126 | 25.759 | 1     | 1      | 1      |
| <i>f__Lachnospiraceae</i>           | core   | H&P1&P2 | 30.89 | 0.01   | 0.016  | 1     | 0.57   | 0.71   |
| <i>k__Bacteria</i>                  | core   | H&P1&P2 | 0.043 | 6.857  | 5.93   | 1     | 1      | 1      |
| <i>o__Clostridiales</i>             | core   | H&P1&P2 | 9.967 | 0.133  | 0.184  | 1     | 1      | 1      |
| <i>Blautia obeum</i>                | core   | H&P1&P2 | 0.176 | 3.5    | 4.506  | 1     | 1      | 1      |
| <i>Eubacterium dolichum</i>         | core   | H&P1&P2 | 0.006 | 3.189  | 3.87   | 0.43  | 1      | 1      |
| <i>g__Bifidobacterium</i>           | core   | H&P1&P2 | 3.54  | 0.649  | 1.919  | 1     | 1      | 1      |
| <i>g__Ruminococcus</i>              | core   | H&P1&P2 | 1.863 | 0.017  | 0.164  | 1     | 0.71   | 1      |
| <i>g__Adlercreutzia</i>             | core   | H&P1&P2 | 0.06  | 0.634  | 1.294  | 1     | 1      | 1      |
| <i>f__EB1017</i>                    | core   | H&P1&P2 | 0.01  | 0.421  | 1.42   | 0.57  | 1      | 1      |
| <i>g__Bilophila</i>                 | core   | H&P1&P2 | 0.103 | 0.483  | 0.857  | 1     | 1      | 1      |
| <i>Bacteroides uniformis</i>        | pan    | H&P2    | 1.913 | 0.001  | 0.004  | 1     | 0.14   | 0.43   |
| <i>g__rc44</i>                      | pan    | P1&P2   | 0     | 22.004 | 14.836 | 0     | 1      | 1      |
| <i>o__YS2</i>                       | pan    | P1&P2   | 0     | 12.896 | 11.934 | 0     | 1      | 1      |
| <i>o__Bacteroidales</i>             | pan    | P1&P2   | 0     | 2.843  | 3.649  | 0     | 1      | 1      |
| <i>f__Lachnospiraceae 2</i>         | pan    | P1&P2   | 0     | 3.514  | 2.323  | 0     | 1      | 1      |
| <i>g__Brevibacillus</i>             | pan    | P1&P2   | 0     | 2.027  | 2.547  | 0     | 1      | 1      |
| <i>g__Planomicrobium</i>            | pan    | P1&P2   | 0     | 2.021  | 1.976  | 0     | 1      | 1      |
| <i>g__Bacteroides 2</i>             | pan    | P1&P2   | 0     | 1.877  | 1.793  | 0     | 1      | 1      |
| <i>Rothia dentocariosa</i>          | pan    | P1&P2   | 0     | 1.299  | 1.431  | 0     | 1      | 1      |
| <i>f__Aerococcaceae</i>             | pan    | P1&P2   | 0     | 1.533  | 1.164  | 0     | 1      | 1      |
| <i>o__RF39</i>                      | pan    | P1&P2   | 0     | 1.073  | 1.471  | 0     | 1      | 1      |
| <i>g__p75a5</i>                     | pan    | P1&P2   | 0     | 1.441  | 0.801  | 0     | 1      | 1      |
| <i>g__Faecalibacterium</i>          | pan    | P1&P2   | 0.001 | 0.789  | 0.83   | 0.14  | 1      | 1      |
| <i>Clostridium intestinale</i>      | pan    | P1&P2   | 0     | 0.456  | 0.074  | 0     | 1      | 1      |

OTUs < 2% across all the samples were not included. A bacterial group is marked as present in a sample group if it was identified in at least 40% (relation = 0.40) of the samples within the group.

**Table S4** Results of the core microbiome analysis of the major OTUs as grouped by the substrates (RAX: rye arabinoxylan; WAX: wheat arabinoxylan; GXG: galactoxyloglucan) and inoculum (Inoc).

| Taxa                                | Type   | Details          | Inoc.abu | RAX.abu | WAX.abu | GXG.abu | Inoc.occ | RAX.occ | WAX.occ | GXG.occ |
|-------------------------------------|--------|------------------|----------|---------|---------|---------|----------|---------|---------|---------|
| <i>Prevotella copri</i>             | core   | Inoc&RAX&WAX&GXG | 0.563    | 22.293  | 19.783  | 12.538  | 1        | 1       | 1       | 1       |
| g__rc44                             | core   | Inoc&RAX&WAX&GXG | 2.31     | 24.54   | 13.166  | 9.807   | 0.67     | 1       | 0.67    | 0.5     |
| o__YS2                              | core   | Inoc&RAX&WAX&GXG | 13.7     | 10.553  | 7.301   | 5.89    | 0.67     | 1       | 0.67    | 0.5     |
| k__Bacteria                         | core   | Inoc&RAX&WAX&GXG | 7.707    | 5.447   | 3.628   | 2.95    | 1        | 1       | 1       | 1       |
| o__Clostridiales                    | core   | Inoc&RAX&WAX&GXG | 3.523    | 0.137   | 3.061   | 5.577   | 1        | 1       | 1       | 1       |
| <i>Blautia obeum</i>                | core   | Inoc&RAX&WAX&GXG | 5.34     | 3.803   | 2.249   | 1.6     | 1        | 1       | 1       | 1       |
| <i>Eubacterium dolichum</i>         | core   | Inoc&RAX&WAX&GXG | 2.77     | 3.807   | 2.144   | 1.737   | 1        | 1       | 0.67    | 0.83    |
| o__Bacteroidales                    | core   | Inoc&RAX&WAX&GXG | 3.487    | 2.857   | 1.891   | 1.565   | 0.67     | 1       | 0.67    | 0.5     |
| g__Bifidobacterium                  | core   | Inoc&RAX&WAX&GXG | 2.61     | 0.487   | 2.024   | 2.54    | 1        | 1       | 1       | 1       |
| f__Lachnospiraceae 2                | core   | Inoc&RAX&WAX&GXG | 1.437    | 3.523   | 2.081   | 1.208   | 0.67     | 1       | 0.67    | 0.5     |
| g__Brevibacillus                    | core   | Inoc&RAX&WAX&GXG | 1.17     | 2.48    | 1.476   | 1.298   | 0.67     | 1       | 0.67    | 0.5     |
| g__Planomicrobium                   | core   | Inoc&RAX&WAX&GXG | 1.787    | 1.633   | 1.297   | 1.008   | 0.67     | 1       | 0.67    | 0.5     |
| g__Bacteroides 2                    | core   | Inoc&RAX&WAX&GXG | 0.453    | 2.773   | 1.239   | 0.81    | 0.67     | 1       | 0.67    | 0.5     |
| <i>Rothia dentocariosa</i>          | core   | Inoc&RAX&WAX&GXG | 0.913    | 1.403   | 0.811   | 0.81    | 0.67     | 1       | 0.67    | 0.5     |
| Aerococaceae                        | core   | Inoc&RAX&WAX&GXG | 3.133    | 1.113   | 0.51    | 0.258   | 0.67     | 1       | 0.67    | 0.5     |
| o__RF39                             | core   | Inoc&RAX&WAX&GXG | 3.73     | 0.35    | 0.391   | 0.342   | 0.67     | 1       | 0.67    | 0.5     |
| g__p75a5                            | core   | Inoc&RAX&WAX&GXG | 2.167    | 1.053   | 0.454   | 0.325   | 0.67     | 1       | 0.67    | 0.5     |
| g__Ruminococcus                     | core   | Inoc&RAX&WAX&GXG | 0.88     | 0.027   | 0.372   | 1.373   | 0.67     | 1       | 0.89    | 1       |
| g__Adlercreutzia                    | core   | Inoc&RAX&WAX&GXG | 0.263    | 0.723   | 0.736   | 0.723   | 1        | 1       | 1       | 1       |
| f__EB1017                           | core   | Inoc&RAX&WAX&GXG | 0.64     | 0.46    | 0.442   | 0.947   | 0.67     | 1       | 0.89    | 0.83    |
| g__Faecalibacterium                 | core   | Inoc&RAX&WAX&GXG | 0.167    | 0.88    | 0.623   | 0.432   | 1        | 1       | 0.67    | 0.5     |
| g__Bilophila                        | core   | Inoc&RAX&WAX&GXG | 1.02     | 0.453   | 0.4     | 0.347   | 1        | 1       | 1       | 1       |
| <i>Bifidobacterium adolescentis</i> | core   | Inoc&RAX&WAX&GXG | 0.483    | 0.017   | 0.61    | 0.29    | 0.67     | 1       | 0.67    | 0.67    |
| <i>Clostridium intestinale</i>      | core   | Inoc&RAX&WAX&GXG | 0.827    | 0.167   | 0.067   | 0.022   | 0.67     | 1       | 0.67    | 0.5     |
| f__Lachnospiraceae                  | pan    | Inoc&WAX&GXG     | 6.573    | 0.003   | 10.103  | 17.625  | 1        | 0.33    | 0.78    | 0.83    |
| <i>Bacteroides uniformis</i>        | pan    | Inoc&WAX&GXG     | 0.27     | 0       | 0.278   | 1.687   | 0.67     | 0       | 0.56    | 0.67    |
| g__Blautia                          | pan    | Inoc&GXG         | 2.18     | 0       | 3.416   | 2.69    | 0.67     | 0       | 0.33    | 0.67    |
| f__Ruminococaceae                   | pan    | WAX&GXG          | 3.003    | 0.003   | 1.74    | 2.805   | 0.33     | 0.33    | 0.44    | 0.5     |
| g__Bacteroides                      | unique | GXG              | 2.16     | 0       | 2.032   | 4.183   | 0.33     | 0       | 0.33    | 0.5     |
| <i>Faecalibacterium prausnitzii</i> | unique | GXG              | 3.227    | 0       | 1.511   | 2.08    | 0.33     | 0       | 0.33    | 0.5     |
| <i>Bacteroides plebeius</i>         | unique | GXG              | 1.09     | 0       | 1.791   | 0.935   | 0.33     | 0       | 0.33    | 0.5     |
| <i>Parabacteroides distasonis</i>   | unique | GXG              | 0.137    | 0       | 0.129   | 1.61    | 0.33     | 0       | 0.33    | 0.5     |

OTUs < 2% across all the samples were not included. A bacterial group is marked as present in a sample group if it was identified in at least 40% (relation = 0.40) of the samples within the group.

## Supplementary Figures

**a**

| Treatment                 | WAX       |          |        | GXG    |                              |
|---------------------------|-----------|----------|--------|--------|------------------------------|
|                           | A/X ratio | Mono-Xyl | Di-Xyl | Un-Xyl |                              |
| WAX/GXG powder            | 0.45      | 0.15     | 0.14   | 0.70   | Gal: Xyl: Glc<br>1:2.41:3.03 |
| WAX/GXG_Med (Autoclaving) | 0.47      | 0.17     | 0.15   | 0.68   | 1:2.34:2.54                  |

**b**

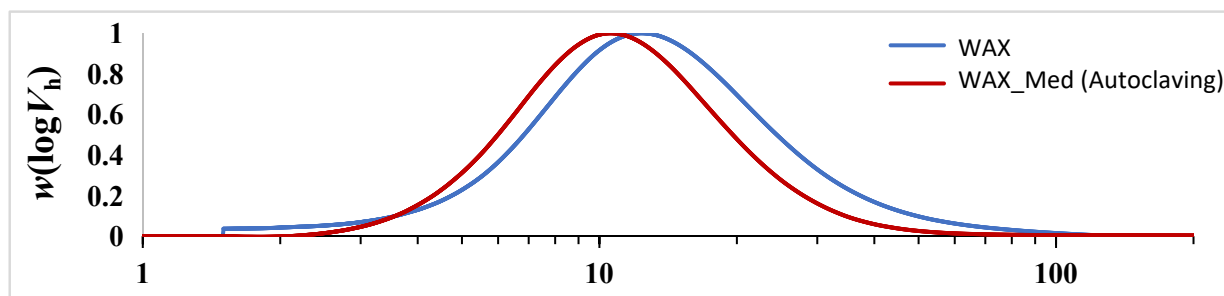

**c**

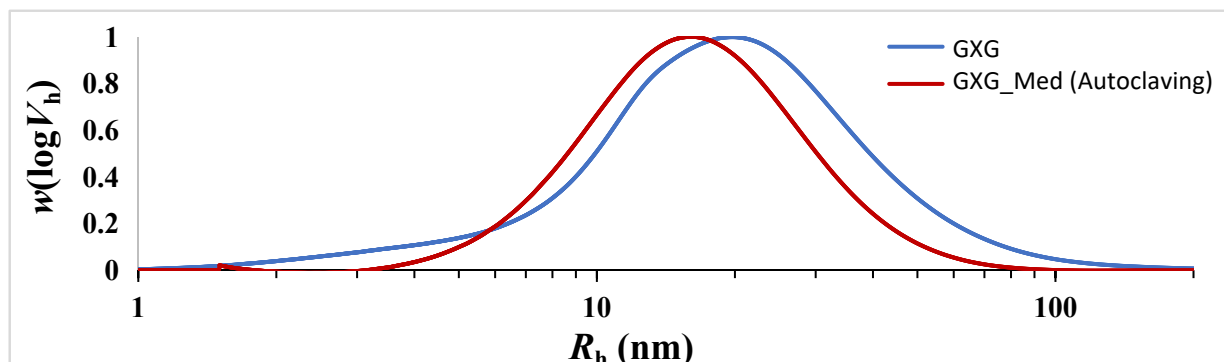

**Figure S1** The effects of autoclaving on the structure of wheat arabinoxylan (WAX) and tamarind galactoxyloglucan (GXG). **(a)**  $^1\text{H}$  NMR analysis of the WAX/GXG powder and WAX/GXG dissolved in the fermentation medium with autoclaving (WAX/GXG\_Med (Autoclaving)). Molecular size distributions (as functions of the relative hydrodynamic radius  $R_h$ ) of WAX **(b)** and GXG **(c)** powder and WAX/GXG\_Med (Autoclaving). Distributions were normalised to the height of the maximum between 1 and 100 nm. The size exclusion chromatography (SEC) was performed according to the method described by Wang *et al.*

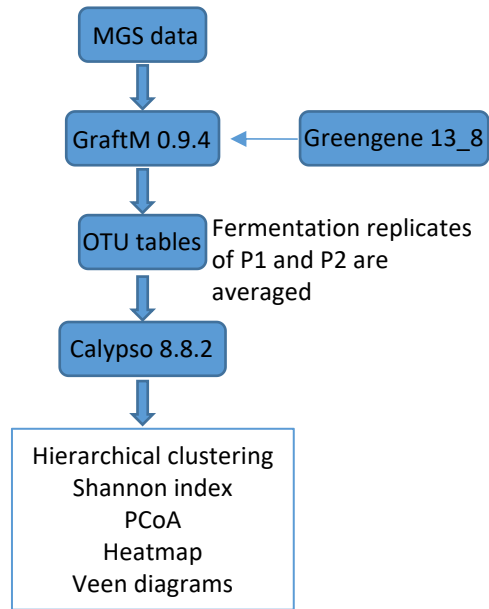

**Figure S2** The bioinformatics workflow used to analyze the shotgun metagenome sequencing (MGS) data.

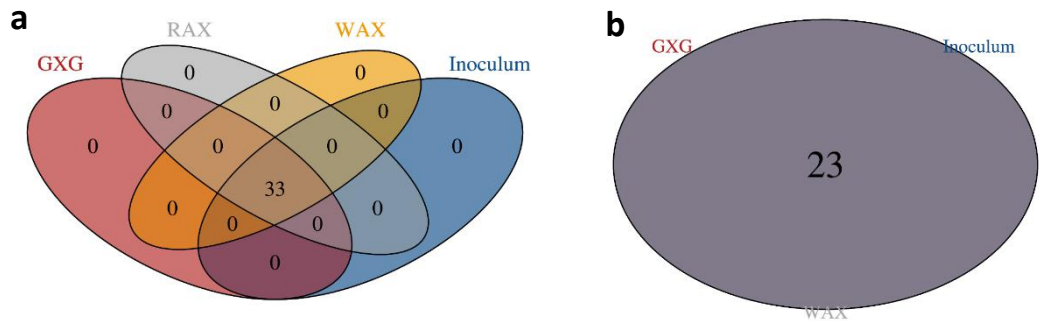

**Figure S3** Venn diagrams representing the core, pan and unique OTUs as grouped by each substrate (WAX, GXG and RAX) & inoculum. The porcine (**a**) and human (**b**) fecal inoculum based samples. OTUs < 1% across all the porcine (**a**) or human (**b**) samples were not included. WAX: wheat arabinoxylan. RAX: rye arabinoxylan. GXG: galactoxyloglucan.

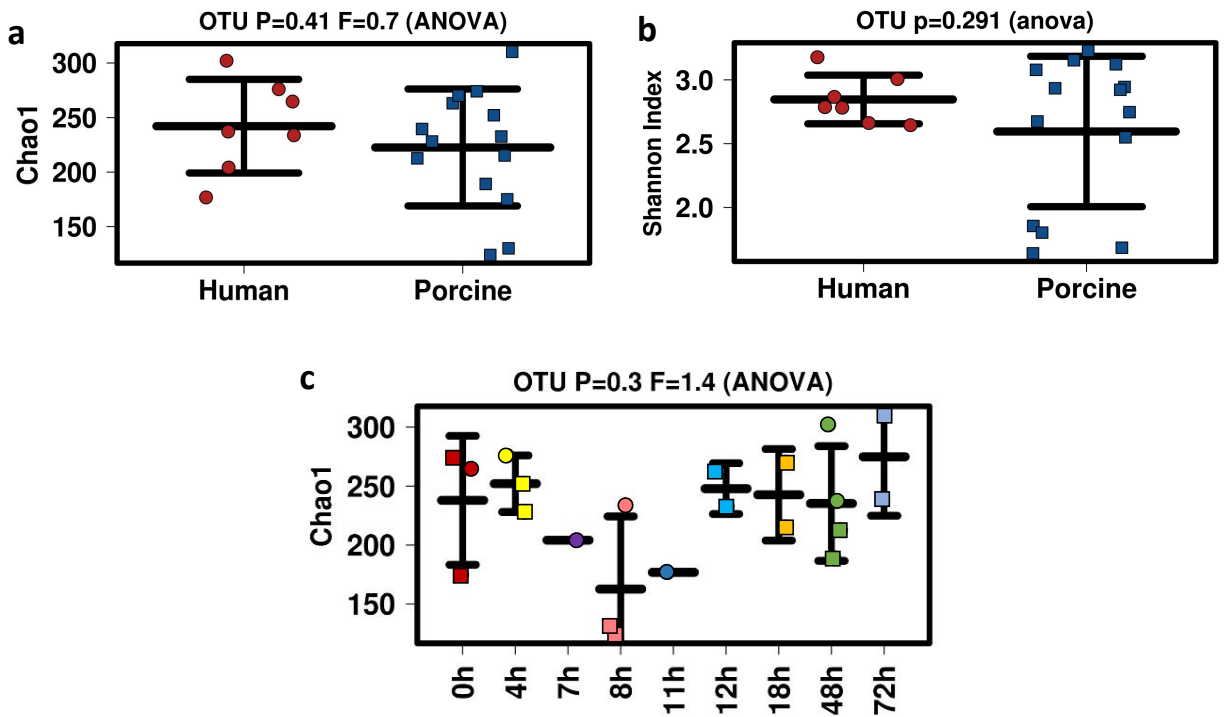

**Figure S4** Microbial richness as shown by Chao1 (a) and Shannon index (b) of  $\alpha$ -diversity as grouped by the inoculum type. (c) Chao 1 as grouped by the fermentation time. Circles represent the human samples, and squares represent the porcine samples.

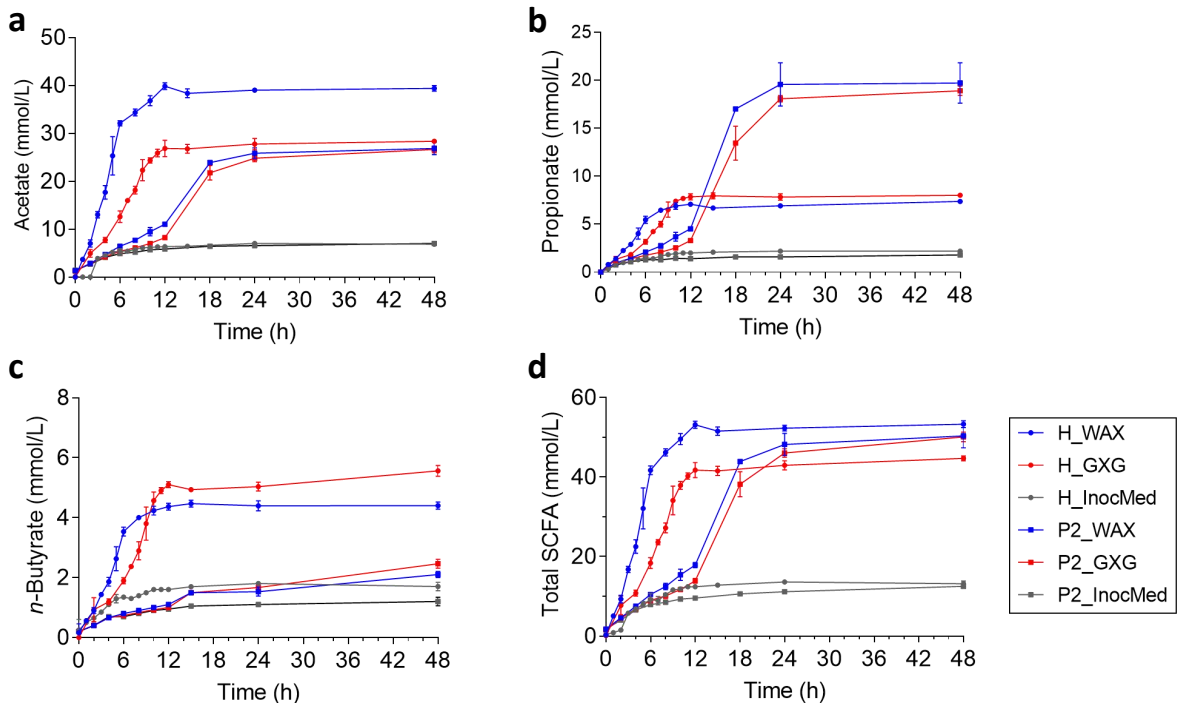

**Figure S5** Short chain fatty acids (a: acetate, b: propionate, c: *n*-butyrate, d: total SCFA) generated during the fermentation of wheat arabinoxylan (WAX) and galactoxyloglucan (GXG) with a human (H) or porcine (P) fecal inoculum. InocMed was the blank that contained the inoculum and the medium but not the substrates. The concentration of the SCFA is expressed in mmol per litre of the fermentation supernatant.

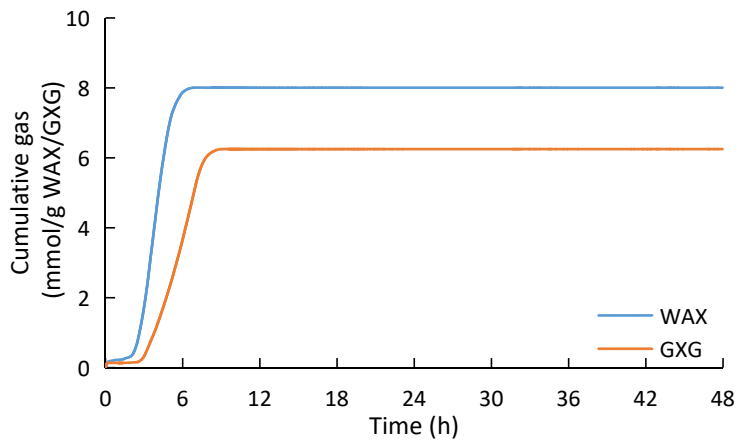

**Figure S6** Cumulative gas production during fermentation of wheat arabinoxylan (WAX) and tamarind galactoxyloglucan (GXG) with a human fecal inoculum.

## References

1. Wang, K., Wambugu, P. W., Zhang, B., Wu, A. C., Henry, R. J., & Gilbert, R. G., The biosynthesis, structure and gelatinization properties of starches from wild and cultivated African rice species (*Oryza barthii* and *Oryza glaberrima*), *Carbohydr. Polym.*, 2015, **129**. 92-100.
